# Supplementary material for: ITS non-concerted evolution and rampant hybridization in the legume genus Lespedeza (Fabaceae)
Source: PubMed Central journal article supplement (PMC5209741; doi:10.1038/srep40057), 2017-01-04
Supplement: srep40057-s1.pdf [file srep40057-s1.pdf]

**ITS non-concerted evolution and rampant hybridization in the legume genus  
*Lespedeza* (Fabaceae)**

Bo Xu<sup>1</sup>, Xiao-Mao Zeng<sup>1</sup>, Xin-Fen Gao<sup>1, \*</sup>, Dong-Pil Jin<sup>2</sup>, Li-Bing Zhang<sup>3, \*</sup>

<sup>1</sup>*CAS Key Laboratory of Mountain Ecological Restoration and Bioresource Utilization & Ecological Restoration and Biodiversity Conservation Key Laboratory of Sichuan Province, Chengdu Institute of Biology, Chinese Academy of Sciences, P.O. Box 416, Chengdu, Sichuan 610041, China*

<sup>2</sup>*Department of Biological Sciences, Inha University, Incheon 402-751, Republic of Korea*

<sup>3</sup>*Missouri Botanical Garden, P.O. Box 299, St. Louis, Missouri 63166, U.S.A.*

<sup>\*</sup>*Authors for correspondence ([xfgao@cib.ac.cn](mailto:xfgao@cib.ac.cn); [Libing.Zhang@mobot.org](mailto:Libing.Zhang@mobot.org))*

**Appendix**

List of taxa sampled with information related to taxonomy, voucher information, GenBank accession numbers, and references.

*Campylotropis hirtella* (Franch.) Schindl., X. F. Gao, Y. Zhang & Z. M. Zhu 11010 (CDBI), Yunnan, China: ITS JN402491 (Xu et al., 2012), PGK KY174339.

*Campylotropis macrocarpa* (Bunge) Rehd., B. Xu & L. B. Zhang 97 (CDBI), Guizhou, China: ITS JN402492 (Xu et al., 2012), PGK (a) KY174340, (b) KY174341.

*Desmodium heterocarpon* (L.) DC., B. Xu & L. B. Zhang 40 (CDBI), Guizhou, China: PGK KY174342. *Desmodium microphyllum* (Thunb.) DC., B. Xu 219 (CDBI), Jiangxi, China: PGK KY174343.

*Kummerowia stipulacea* (Maxim.) Makino, B. Xu & Z. M. Zhu 370 (CDBI), Liaoning, China: ITS JN402493, PGK KY174344. *Kummerowia striata* (Thunb.) Schindl. N. C. Henderson 04-01 (MO), Alabama, USA: ITS JN402494.

*Lespedeza angustifolia* (Pursh) Elliott, R. kral 64371 (MO), Tennessee, USA: ITS (-1) KY174444, (-2) KY174445, (-3) KY174446, (-4) KY174447, (-5) KY174448, (-6) KY174449, (-7) KY174450, (-8) KY174451, (-9) KY174452, (-10) KY174453, PGK KY174345. *Lespedeza bicolor* Turcz., **1**, B. Xu & Z. M. Zhu 379 (CDBI), Liaoning, China: ITS (-1) KY174454, (-2) KY174455, (-3) KY174456, (-4) KY174457, (-5) KY174458, (-6) KY174459, (-7) KY174460, PGK (a) KY174346, (b) KY174347; **2**, B. Xu 248 (CDBI), Zhejiang, China: ITS (-1) KY174461, (-2) KY174462, (-3) KY174463, (-4) KY174464, (-5) KY174465, (-6) KY174466, (-7) KY174467, (-8) KY174468; **3**, B. Xu & Z. M. Zhu 356 (CDBI), Hebei, China: ITS (-1) KY174469, (-2) KY174470, (-3) KY174471, (-4) KY174472, (-5) KY174473, (-6) KY174474, (-7) KY174475, (-8) KY174476; **4**, K. Yonekura, 11711 (PE), Hokkaido, Japan: PGK (a) KY174348, (b) KY174349. *Lespedeza buergeri* Miq., **1**, B. Xu & Z. M. Zhu 333-2 (CDBI), Henan, China: ITS (-1) KY174477, (-2) KY174478, (-3) KY174479, (-4) KY174480, (-5) KY174481, (-6) KY174482, (-7) KY174483, (-8) KY174484, PGK KY174350; **2**, B. Xu

187 (CDBI), Jiangxi, China: ITS (-1) KY174485, (-2) KY174486, (-3) KY174487, (-4) KY174488, (-5) KY174489, (-6) KY174490, (-7) KY174491, (-8) KY174492, (-9) KY174493, (-10) KY174494, PGK (a) KY174351, (b) KY174352; **3**, *T. Azuma & C. Tanifuji* 382 (PE), Honshu, Japan: ITS (-1) KY174495, (-2) KY174496, (-3) KY174497, (-4) KY174498, (-5) KY174499, (-6) KY174500, (-7) KY174501, (-8) KY174502, (-9) KY174503. *Lespedeza capitata* Michx., *N. C. Henderson* 02-97 (MO), Missouri, USA: ITS (-1) KY174504, (-2) KY174505, (-3) KY174506, (-4) KY174507, (-5) KY174508, (-6) KY174509, (-7) KY174510, (-8) KY174511, (-9) KY174512, (-10) KY174513, PGK KY174353. *Lespedeza caraganae* Bunge, **1**, *B. Xu & Z. M. Zhu* 353 (CDBI), Hebei, China: ITS (-1) KY174514, (-2) KY174515, (-3) KY174516, (-4) KY174517, (-5) KY174518, (-6) KY174519, (-7) KY174520, (-8) KY174521, (-9) KY174522, (-10) KY174523, PGK KY174354; **2**, *B. Xu & Z. M. Zhu* 384 (CDBI), Beijing, China: PGK KY174355; **3**, *B. Xu & Z. M. Zhu* 326-1 (CDBI), Henan, China: PGK KY174356; **4**, *B. Xu & Z. M. Zhu* 326-15 (CDBI), Henan, China: PGK KY174357; **5**, *B. Xu & Z. M. Zhu* 326-25 (CDBI), Henan, China: PGK KY174358. *Lespedeza chinensis* G. Don, **1**, *B. Xu* 202 (CDBI), Jiangxi, China: PGK KY174359; **2**, *B. Xu* 227 (CDBI), Jiangxi, China: ITS (-1) KY174524, (-2) KY174525, (-3) KY174526, (-4) KY174527, (-5) KY174528, (-6) KY174529, (-7) KY174530, (-8) KY174531, (-9) KY174532, (-10) KY174533, PGK KY174360. *Lespedeza cuneata* (Dum. Cours.) G. Don, **1**, *B. Xu & L. B. Zhang* 88-1 (CDBI), Guizhou, China: PGK KY174361; **2**, *B. Xu & L. B. Zhang* 88-3 (CDBI), Guizhou, China: ITS (-1) KY174534, (-2) KY174535, (-3) KY174536, (-4) KY174537, (-5) KY174538, (-6) KY174539, (-7) KY174540, PGK KY174362; **3**, *B. Xu & L. B. Zhang* 90-11 (CDBI), Guizhou, China: PGK KY174363; **4**, *B. Xu & L. B. Zhang* 90-19 (CDBI), Guizhou, China: PGK KY174364; **5**, *B. Xu & W. G. Tu* 403 (CDBI), Sichuan, China: PGK KY174365. *Lespedeza cyrtobotrya* Miq., **1**, *B. Xu & Z. M. Zhu* 338 (CDBI), Henan, China: ITS (-1) KY174541, (-2) KY174542, (-3) KY174543, (-4) KY174544, (-5) KY174545, (-6) KY174546, (-7) KY174547, (-8) KY174548; **2**, *B. Xu* 151 (CDBI), Shaanxi, China: PGK (a) KY174366, (b) KY174367; **3**, *D. P. Jin* 138843 (CDBI), Honshu, Japan: ITS (-1) KY174549, (-2) KY174550, (-3) KY174551, (-4) KY174552, (-5) KY174553, (-6) KY174554, (-7) KY174555, PGK (a) KY174368, (b) KY174369. *Lespedeza daurica* (Laxm.) Schindl., **1**, *B. Xu & Z. M. Zhu* 369-13 (CDBI), Liaoning, China: PGK (a) KY174370, (b) KY174371; **2**, *B. Xu* 126 (CDBI), Shaanxi, China: ITS (-1) KY174556, (-2) KY174557, (-3) KY174558, (-4) KY174559, (-5) KY174560, (-6) KY174561, (-7) KY174562, (-8) KY174563, (-9) KY174564, (-10) KY174565, PGK (a) KY174372, (b) KY174373. *Lespedeza davidii* Franch., **1**, *B. Xu & L. B. Zhang* 98 (CDBI), Guizhou, China: ITS (-1) KY174566, (-2) KY174567, (-3) KY174568, (-4) KY174569, (-5) KY174570, (-6) KY174571, (-7) KY174572, (-8) KY174573, PGK (a) KY174374, (b) KY174375; **2**, *B. Xu* 191 (CDBI), Jiangxi, China: ITS (-1) KY174574, (-2) KY174575, (-3) KY174576, (-4) KY174577, (-5) KY174578, (-6) KY174579, (-7) KY174580, (-8) KY174581, PGK (a) KY174376, (b) KY174377; **3**, *B. Xu* 238 (CDBI), Zhejiang, China: PGK (a) KY174378, (b) KY174379. *Lespedeza dunnii* Schindl., *B. Xu* 255 (CDBI), Zhejiang, China: ITS (-1) KY174582, (-2) KY174583, (-3) KY174584, (-4) KY174585, (-5) KY174586, (-6) KY174587, (-7) KY174588, (-8) KY174589, (-9) KY174590, PGK (a) KY174380, (b) KY174381. *Lespedeza*

*fasciculiflora* Franch., **1**, X. F. Gao & B. Xu 9594 (CDBI), Yunnan, China: ITS (-1) KY174591, (-2) KY174592, (-3) KY174593, (-4) KY174594, (-5) KY174595, (-6) KY174596, (-7) KY174597, (-8) KY174598, (-9) KY174599, PGK KY174382; **2**, X. F. Gao & B. Xu 9776 (CDBI), Sichuan, China: PGK KY174383. *Lespedeza floribunda* Bunge, **1**, B. Xu & L. B. Zhang 398 (CDBI), Beijing, China: PGK KY174384; **2**, B. Xu & L. B. Zhang 95-11 (CDBI), Guizhou, China: ITS (-1) KY174600, (-2) KY174601, (-3) KY174602, (-4) KY174603, (-5) KY174604, (-6) KY174605, (-7) KY174606, (-8) KY174607, (-9) KY174608, PGK KY174385; **3**, B. Xu 127-28 (CDBI), Shaanxi, China: PGK KY174386. *Lespedeza fordii* Schindl., **1**, B. Xu 192 (CDBI), Jiangxi, China: PGK KY174387; **2**, B. Xu 226 (CDBI), Jiangxi, China: ITS (-1) KY174609, (-2) KY174610, (-3) KY174611, (-4) KY174612, (-5) KY174613, (-6) KY174614, (-7) KY174615, (-8) KY174616, (-9) KY174617, PGK (a) KY174388, (b) KY174389.

*Lespedeza formosa* (Vogel) Koehne, **1**, B. Xu & L. B. Zhang 1 (CDBI), Guizhou, China: ITS (-1) KY174618, (-2) KY174619, (-3) KY174620, (-4) KY174621, (-5) KY174622, (-6) KY174623, (-7) KY174624, (-8) KY174625, (-9) KY174626, (-10) KY174627, PGK (a) KY174390, (b) KY174391; **2**, B. Xu 184-1 (CDBI), Hubei, China: ITS (-1) KY174628, (-2) KY174629, (-3) KY174630, (-4) KY174631, (-5) KY174632, (-6) KY174633, (-7) KY174634, (-8) KY174635, (-9) KY174636, (-10) KY174637; **3**, B. Xu & Z. M. Zhu 337 (CDBI), Henan, China: PGK (a) KY174392, (b) KY174393; **4**, B. Xu 195 (CDBI), Jiangxi, China: ITS (-1) KY174638, (-2) KY174639, (-3) KY174640, (-4) KY174641, (-5) KY174642, (-6) KY174643, (-7) KY174644, (-8) KY174645, (-9) KY174646, (-10) KY174647; **5**, B. Xu 262-12 (CDBI), Zhejiang, China: ITS (-1) KY174648, (-2) KY174649, (-3) KY174650, (-4) KY174651, (-5) KY174652, (-6) KY174653, (-7) KY174654, (-8) KY174655, (-9) KY174656, (-10) KY174657. *Lespedeza forrestii* Schindl., X. F. Gao & B. Xu 9626 (CDBI), Yunnan, China: ITS (-1) KY174658, (-2) KY174659, (-3) KY174660, (-4) KY174661, (-5) KY174662, (-6) KY174663, (-7) KY174664, (-8) KY174665, (-9) KY174666, PGK KY174394. *Lespedeza hengduanshanensis* (C. J. Chen) Xu, Gao & Zhang, X. F. Gao & B. Xu 9384 (CDBI), Sichuan, China: ITS (-1) KY174667, (-2) KY174668, (-3) KY174669, (-4) KY174670, (-5) KY174671, (-6) KY174672, (-7) KY174673, (-8) KY174674, (-9) KY174675, (-10) KY174676, PGK KY174395. *Lespedeza hirta* (L.) Hornem., R. Dale 97963 (MO), Louisiana, USA: ITS (-1) KY174677, (-2) KY174678, (-3) KY174679, (-4) KY174680, (-5) KY174681, (-6) KY174682, (-7) KY174683, (-8) KY174684, (-9) KY174685, PGK KY174396. *Lespedeza hispida* (Franch) Nemoto & Ohashi, X. F. Gao 504 (KUN), Yunnan, China: ITS (-1) KY174686, (-2) KY174687, (-3) KY174688, (-4) KY174689, (-5) KY174690, (-6) KY174691, (-7) KY174692, (-8) KY174693. *Lespedeza homoloba* Nakai, M. Takahashi & K. Takahashi 1613 (PE), Shikoku, Japan: ITS (-1) KY174694, (-2) KY174695, (-3) KY174696, (-4) KY174697, (-5) KY174698, (-6) KY174699, (-7) KY174700, (-8) KY174701, (-9) KY174702. *Lespedeza inschanica* Schindl., **1**, B. Xu & Z. M. Zhu 378 (CDBI), Liaoning, China: PGK KY174397; **2**, B. Xu 143 (CDBI), Shaanxi, China: ITS (-1) KY174703, (-2) KY174704, (-3) KY174705, (-4) KY174706, (-5) KY174707, (-6) KY174708, (-7) KY174709, (-8) KY174710, (-9) KY174711, (-10) KY174712, PGK KY174398. *Lespedeza intermedia* (S. Watson ex A. Gray) Britton, R. D. Thomas, E. Sundell & C. Amason 107866 (MO), Arkansas, USA: ITS (-1)

KY174713, (-2) KY174714, (-3) KY174715, (-4) KY174716, (-5) KY174717, (-6) KY174718, (-7) KY174719, (-8) KY174720, (-9) KY174721, (-10) KY174722, (-11) KY174723, PGK KY174399. *Lespedeza jiangxiensis* Xu, Gao & Zhang, **1**, *B. Xu 198* (CDBI), Jiangxi, China: ITS (-1) KY174724, (-2) KY174725, (-3) KY174726, (-4) KY174727, (-5) KY174728, (-6) KY174729, (-7) KY174730, (-8) KY174731, (-9) KY174732, (-10) KY174733, PGK (a) KY174400, (b) KY174401; **2**, *B. Xu 218* (CDBI), Jiangxi, China: ITS (-1) KY174734, (-2) KY174735, (-3) KY174736, (-4) KY174737, (-5) KY174738, (-6) KY174739, (-7) KY174740, (-8) KY174741, (-9) KY174742, (-10) KY174743, PGK (a) KY174402, (b) KY174403. *Lespedeza juncea* (L) Pers., **1**, *X. F. Gao 9836* (CDBI), Beijing, China: PGK KY174404; **2**, *B. Xu & Z. M. Zhu 372* (CDBI), Liaoning, China: PGK KY174405; **3**, *B. Xu & Z. M. Zhu 377* (CDBI), Liaoning, China: ITS (-1) KY174744, (-2) KY174745, (-3) KY174746, (-4) KY174747, (-5) KY174748, (-6) KY174749, PGK KY174406; **4**, *B. Xu & Z. M. Zhu 358* (CDBI), Hebei, China: PGK KY174407. *Lespedeza lichiyuniae* Nemoto & Ohashi, **1**, *B. Xu & L. B. Zhang 57* (CDBI), Guizhou, China: PGK KY174408; **2**, *B. Xu & L. B. Zhang 47* (CDBI), Guizhou, China: PGK KY174409; **3**, *X. M. An 3641* (PE), Guizhou, China: ITS (-1) KY174750, (-2) KY174751, (-3) KY174752, (-4) KY174753, (-5) KY174754, (-6) KY174755, (-7) KY174756, (-8) KY174757, (-9) KY174758, (-10) KY174759, PGK KY174410; **4**, *B. Xu 433* (PE), Zhejiang, China: PGK KY174411. *Lespedeza maximowiczii* C.K. Schneid., **1**, *B. Xu 265* (CDBI), Henan, China: ITS (-1) KY174760, (-2) KY174761, (-3) KY174762, (-4) KY174763, (-5) KY174764, (-6) KY174765, (-7) KY174766, (-8) KY174767; **2**, *B. Xu 237* (CDBI), Zhejiang, China: ITS (-1) KY174768, (-2) KY174769, (-3) KY174770, (-4) KY174771, (-5) KY174772, (-6) KY174773, (-7) KY174774, (-8) KY174775, (-9) KY174776, (-10) KY174777, PGK (a) KY174412, (b) KY174413. *Lespedeza melanantha* Nakai, *D. P. Jin 128151* (CDBI), Kyeongsangnamdo, Korea: ITS (-1) KY174778, (-2) KY174779, (-3) KY174780, (-4) KY174781, (-5) KY174782, (-6) KY174783, (-7) KY174784, PGK (a) KY174414, (b) KY174415. *Lespedeza patens* Nakai, *B. Xu 233* (CDBI), Jiangxi, China: ITS (-1) KY174785, (-2) KY174786, (-3) KY174787, (-4) KY174788, (-5) KY174789, (-6) KY174790, (-7) KY174791, (-8) KY174792, (-9) KY174793, (-10) KY174794, PGK (a) KY174416, (b) KY174417. *Lespedeza pilosa* Siebold & Zucc., *B. Xu 257* (CDBI), Zhejiang, China: ITS (-1) KY174795, (-2) KY174796, (-3) KY174797, (-4) KY174798, (-5) KY174799, (-6) KY174800, (-7) KY174801, (-8) KY174802, (-9) KY174803, PGK KY174418. *Lespedeza potaninii* Vassiliev, **1**, *B. Xu 272* (CDBI), Shaanxi, China: PGK (a) KY174419, (b) KY174420; **2**, *B. Xu 404* (CDBI), Sichuan, China: PGK (a) KY174421, (b) KY174422; **3**, *B. Xu 9684* (CDBI), Sichuan, China: ITS (-1) KY174804, (-2) KY174805, (-3) KY174806, (-4) KY174807, (-5) KY174808, (-6) KY174809, (-7) KY174810, (-8) KY174811, PGK (a) KY174423, (b) KY174424. *Lespedeza repens* (L.) W. P. C. Barton, *N. C. Henderson 95-683* (MO), Kansas, USA: ITS (-1) KY174812, (-2) KY174813, (-3) KY174814, (-4) KY174815, (-5) KY174816, (-6) KY174817, (-7) KY174818, (-8) KY174819, (-9) KY174820, PGK KY174425. *Lespedeza stuevei* Nutt., *C. Becker 1444* (MO), Missouri, USA: ITS (-1) KY174821, (-2) KY174822, (-3) KY174823, (-4) KY174824, (-5) KY174825, (-6) KY174826, (-7) KY174827, (-8) KY174828, (-9) KY174829, (-10) KY174830, PGK KY174426. *Lespedeza tomentosa*

(Thunb.) Siebold ex Maxim., **1**, *B. Xu & L. B. Zhang 55* (CDBI), Guizhou, China: ITS (-1) KY174831, (-2) KY174832, (-3) KY174833, (-4) KY174834, (-5) KY174835, (-6) KY174836, (-7) KY174837, (-8) KY174838, (-9) KY174839, (-10) KY174840, PGK KY174427; **2**, *B. Xu 145* (CDBI), Shaanxi, China: PGK KY174428. *Lespedeza violacea* (L.) Pers., *L. B. Zhang 4817* (MO), Missouri, USA: ITS (-1) KY174841, (-2) KY174842, (-3) KY174843, (-4) KY174844, (-5) KY174845, (-6) KY174846, (-7) KY174847, (-8) KY174848, (-9) KY174849, (-10) KY174850, PGK KY174429. *Lespedeza virgata* (Thunb.) DC., **1**, *B. Xu & L. B. Zhang 104* (CDBI), Guizhou, China: PGK KY174430; **2**, *B. Xu 201* (CDBI), Jiangxi, China: ITS (-1) KY174851, (-2) KY174852, (-3) KY174853, (-4) KY174854, (-5) KY174855, (-6) KY174856, (-7) KY174857, (-8) KY174858, (-9) KY174859, (-10) KY174860, PGK KY174431; **3**, *B. Xu 324* (CDBI), Shaanxi, China: PGK KY174432. *Lespedeza virginica* (L.) Britton, *L. B. Zhang 4816* (MO), Missouri, USA: ITS (-1) KY174861, (-2) KY174862, (-3) KY174863, (-4) KY174864, (-5) KY174865, (-6) KY174866, (-7) KY174867, (-8) KY174868, (-9) KY174869, PGK (a) KY174433, (b) KY174434. *Lespedeza wilfordii* Ricker, **1**, *B. Xu 206-1* (CDBI), Jiangxi, China: ITS (-1) KY174870, (-2) KY174871, (-3) KY174872, (-4) KY174873, (-5) KY174874, (-6) KY174875, (-7) KY174876, (-8) KY174877, (-9) KY174878, (-10) KY174879, PGK (a) KY174435, (b) KY174436; **2**, *B. Xu 209* (CDBI), Jiangxi, China: ITS (-1) KY174880, (-2) KY174881, (-3) KY174882, (-4) KY174883, (-5) KY174884, (-6) KY174885, (-7) KY174886, (-8) KY174887, (-9) KY174888, PGK KY174437; **3**, *B. Xu 252* (CDBI), Zhejiang, China: ITS (-1) KY174889, (-2) KY174890, (-3) KY174891, (-4) KY174892, (-5) KY174893, (-6) KY174894, (-7) KY174895, PGK (a) KY174438, (b) KY174439; **4**, *B. Xu 256* (CDBI), Zhejiang, China: PGK (a) KY174440, (b) KY174441; **5**, *B. Xu 249* (CDBI), Zhejiang, China: PGK (a) KY174442, (b) KY174443.

**Table S1. Sequence characteristics of ITS1-5.8S-ITS2 region in *Lespedeza***

| Accession name               | GC content [%] |              |              | Position of nucleotide changes<br>(nt-) in conserved 5.8S motives |           |             | Secondary structure of | Note              |
|------------------------------|----------------|--------------|--------------|-------------------------------------------------------------------|-----------|-------------|------------------------|-------------------|
|                              | ITS1           | 5.8S         | ITS2         | M1                                                                | M2        | M3          | 5.8S                   |                   |
| <i>L. angustifolia</i> -1    | 61.48          | 54.78        | 62.04        | conserved                                                         | conserved | conserved   | XXXXXX                 |                   |
| <i>L. angustifolia</i> -2    | 61.48          | 54.78        | 62.04        | conserved                                                         | conserved | conserved   | XXXXXX                 |                   |
| <i>L. angustifolia</i> -3    | 61.48          | 54.78        | 62.04        | conserved                                                         | conserved | conserved   | XXXXXX                 |                   |
| <i>L. angustifolia</i> -4    | 61.48          | 54.78        | 62.04        | conserved                                                         | conserved | conserved   | XXXXXX                 |                   |
| <i>L. angustifolia</i> -5    | 61.48          | 54.78        | 62.04        | conserved                                                         | conserved | conserved   | XXXXXX                 |                   |
| <i>L. angustifolia</i> -6    | 61.48          | 54.78        | 62.04        | conserved                                                         | conserved | conserved   | XXXXXX                 |                   |
| <i>L. angustifolia</i> -7    | 61.48          | 54.78        | 62.04        | conserved                                                         | conserved | conserved   | XXXXXX                 |                   |
| <i>L. angustifolia</i> -8    | 61.48          | 54.78        | 62.04        | conserved                                                         | conserved | conserved   | XXXXXX                 |                   |
| <i>L. angustifolia</i> -9    | 61.48          | 54.78        | 62.04        | conserved                                                         | conserved | conserved   | XXXXXX                 |                   |
| <i>L. angustifolia</i> -10   | 61.48          | 54.78        | 62.04        | conserved                                                         | conserved | conserved   | XXXXXX                 |                   |
| <i>L. bicolor</i> -1-1       | 65.45          | 54.78        | 67.61        | conserved                                                         | conserved | conserved   | XXXXXX                 |                   |
| <i>L. bicolor</i> -1-2       | 66.40          | 54.78        | 68.08        | conserved                                                         | conserved | conserved   | XXXXXX                 |                   |
| <b><i>L. bicolor</i>-1-3</b> | <b>62.30</b>   | 55.41        | 67.14        | <b>nt-16</b>                                                      | conserved | conserved   | XXXXXX                 | <b>pseudogene</b> |
| <b><i>L. bicolor</i>-1-4</b> | <b>63.52</b>   | <b>50.96</b> | <b>63.85</b> | <b>nt-16</b>                                                      | conserved | conserved   | XXXXXX                 | <b>pseudogene</b> |
| <b><i>L. bicolor</i>-1-5</b> | <b>61.89</b>   | 53.50        | <b>62.19</b> | <b>nt-12</b>                                                      | conserved | <b>nt-6</b> | <b>X-XX-</b>           | <b>pseudogene</b> |
| <b><i>L. bicolor</i>-1-6</b> | <b>62.30</b>   | <b>50.96</b> | <b>63.38</b> | <b>nt-16</b>                                                      | conserved | conserved   | XXXXXX                 | <b>pseudogene</b> |
| <i>L. bicolor</i> -1-7       | 66.40          | 54.78        | 68.08        | conserved                                                         | conserved | conserved   | XXXXXX                 |                   |
| <i>L. bicolor</i> -2-1       | 66.26          | 54.78        | 67.61        | conserved                                                         | conserved | conserved   | XXXXXX                 |                   |
| <i>L. bicolor</i> -2-2       | 66.27          | 54.78        | 68.08        | conserved                                                         | conserved | conserved   | XXXXXX                 |                   |
| <i>L. bicolor</i> -2-3       | 64.02          | 54.78        | 67.61        | conserved                                                         | conserved | conserved   | XXXXXX                 |                   |
| <i>L. bicolor</i> -2-4       | 65.87          | 54.78        | 67.61        | conserved                                                         | conserved | conserved   | XXXXXX                 |                   |
| <i>L. bicolor</i> -2-5       | 65.87          | 54.78        | 67.61        | conserved                                                         | conserved | conserved   | XXXXXX                 |                   |
| <i>L. bicolor</i> -2-6       | 66.40          | 54.78        | 68.08        | conserved                                                         | conserved | conserved   | XXXXXX                 |                   |
| <i>L. bicolor</i> -2-7       | 66.80          | 54.78        | 68.54        | conserved                                                         | conserved | conserved   | XXXXXX                 |                   |
| <b><i>L. bicolor</i>-2-8</b> | 64.75          | 55.41        | <b>64.73</b> | <b>nt-4</b>                                                       | conserved | conserved   | <b>X-XXX</b>           | <b>pseudogene</b> |
| <i>L. bicolor</i> -3-1       | 66.27          | 54.78        | 67.61        | conserved                                                         | conserved | conserved   | XXXXXX                 |                   |
| <i>L. bicolor</i> -3-2       | 65.87          | 54.78        | 67.14        | conserved                                                         | conserved | conserved   | XXXXXX                 |                   |
| <i>L. bicolor</i> -3-3       | 65.87          | 54.78        | 67.61        | conserved                                                         | conserved | conserved   | XXXXXX                 |                   |
| <i>L. bicolor</i> -3-4       | 65.87          | 54.78        | 67.61        | conserved                                                         | conserved | conserved   | XXXXXX                 |                   |
| <i>L. bicolor</i> -3-5       | 65.87          | 54.78        | 67.61        | conserved                                                         | conserved | conserved   | XXXXXX                 |                   |
| <i>L. bicolor</i> -3-6       | 65.60          | 54.78        | 67.61        | conserved                                                         | conserved | conserved   | XXXXXX                 |                   |
| <i>L. bicolor</i> -3-7       | 65.87          | 54.78        | 67.61        | conserved                                                         | conserved | conserved   | XXXXXX                 |                   |
| <i>L. bicolor</i> -3-8       | 65.48          | 54.78        | 67.61        | conserved                                                         | conserved | conserved   | XXXXXX                 |                   |
| <i>L. buergeri</i> -1-1      | 66.00          | 54.78        | 67.45        | conserved                                                         | conserved | conserved   | XXXXXX                 |                   |
| <i>L. buergeri</i> -1-2      | 66.00          | 54.78        | 67.45        | conserved                                                         | conserved | conserved   | XXXXXX                 |                   |
| <i>L. buergeri</i> -1-3      | 66.40          | 54.78        | 67.45        | conserved                                                         | conserved | conserved   | XXXXXX                 |                   |
| <i>L. buergeri</i> -1-4      | 66.40          | 54.78        | 67.45        | conserved                                                         | conserved | conserved   | XXXXXX                 |                   |
| <i>L. buergeri</i> -1-5      | 66.00          | 54.78        | 67.61        | conserved                                                         | conserved | conserved   | XXXXXX                 |                   |
| <i>L. buergeri</i> -1-6      | 66.00          | 54.78        | 67.45        | conserved                                                         | conserved | conserved   | XXXXXX                 |                   |
| <i>L. buergeri</i> -1-7      | 64.90          | 54.78        | 67.45        | conserved                                                         | conserved | conserved   | XXXXXX                 |                   |
| <i>L. buergeri</i> -1-8      | 66.40          | 54.78        | 67.61        | conserved                                                         | conserved | conserved   | XXXXXX                 |                   |
| <i>L. buergeri</i> -2-1      | 66.00          | 54.78        | 67.61        | conserved                                                         | conserved | conserved   | XXXXXX                 |                   |
| <i>L. buergeri</i> -2-2      | 66.00          | 55.41        | 67.14        | conserved                                                         | conserved | conserved   | XXXXXX                 |                   |
| <i>L. buergeri</i> -2-3      | 66.00          | 55.41        | 67.61        | conserved                                                         | conserved | conserved   | XXXXXX                 |                   |
| <i>L. buergeri</i> -2-4      | 65.60          | 54.78        | 67.61        | conserved                                                         | conserved | conserved   | XXXXXX                 |                   |
| <i>L. buergeri</i> -2-5      | 66.00          | 54.78        | 67.61        | conserved                                                         | conserved | conserved   | XXXXXX                 |                   |

|                                |              |              |              |              |                |               |              |                   |
|--------------------------------|--------------|--------------|--------------|--------------|----------------|---------------|--------------|-------------------|
| <i>L. buergeri</i> -2-6        | 65.60        | 54.14        | 67.61        | conserved    | conserved      | conserved     | XXXXXX       |                   |
| <i>L. buergeri</i> -2-7        | 66.00        | 54.78        | 67.61        | conserved    | conserved      | conserved     | XXXXXX       |                   |
| <i>L. buergeri</i> -2-8        | 66.00        | 54.14        | 67.61        | conserved    | conserved      | conserved     | XXXXXX       |                   |
| <i>L. buergeri</i> -2-9        | 66.40        | 54.78        | 68.08        | conserved    | conserved      | conserved     | XXXXXX       |                   |
| <i>L. buergeri</i> -2-10       | 66.40        | 54.78        | 67.45        | conserved    | conserved      | conserved     | XXXXXX       |                   |
| <i>L. buergeri</i> -3-1        | 65.57        | 54.78        | 68.08        | conserved    | conserved      | conserved     | XXXXXX       |                   |
| <i>L. buergeri</i> -3-2        | 65.57        | 54.78        | 68.08        | conserved    | conserved      | conserved     | XXXXXX       |                   |
| <i>L. buergeri</i> -3-3        | 65.57        | 55.41        | 68.54        | conserved    | conserved      | conserved     | XXXXXX       |                   |
| <b><i>L. buergeri</i>-3-4</b>  | 65.16        | 52.87        | 67.61        | <b>nt-16</b> | conserved      | <b>nt-8</b>   | <b>XXX--</b> | <b>pseudogene</b> |
| <i>L. buergeri</i> -3-5        | 65.57        | 54.78        | 69.01        | conserved    | conserved      | conserved     | XXXXXX       |                   |
| <i>L. buergeri</i> -3-6        | 65.57        | 54.78        | 68.08        | conserved    | conserved      | conserved     | XXXXXX       |                   |
| <i>L. buergeri</i> -3-7        | 65.57        | 54.78        | 68.08        | conserved    | conserved      | conserved     | XXXXXX       |                   |
| <i>L. buergeri</i> -3-8        | 65.57        | 54.78        | 68.54        | conserved    | conserved      | conserved     | XXXXXX       |                   |
| <i>L. buergeri</i> -3-9        | 65.98        | 54.78        | 68.54        | conserved    | conserved      | conserved     | XXXXXX       |                   |
| <i>L. buergeri</i> -3-10       | 65.98        | 54.78        | 68.08        | conserved    | conserved      | conserved     | XXXXXX       |                   |
| <i>L. capitata</i> -1          | 61.22        | 54.78        | 62.50        | conserved    | conserved      | conserved     | XXXXXX       |                   |
| <i>L. capitata</i> -2          | 61.22        | 54.78        | 62.04        | conserved    | conserved      | conserved     | XXXXXX       |                   |
| <i>L. capitata</i> -3          | 62.04        | 54.78        | 61.57        | conserved    | conserved      | conserved     | XXXXXX       |                   |
| <i>L. capitata</i> -4          | 61.22        | 54.14        | 62.50        | conserved    | conserved      | conserved     | XXXXXX       |                   |
| <i>L. capitata</i> -5          | 61.63        | 54.78        | 61.57        | conserved    | conserved      | conserved     | XXXXXX       |                   |
| <i>L. capitata</i> -6          | 61.63        | 54.78        | 62.04        | conserved    | conserved      | conserved     | XXXXXX       |                   |
| <i>L. capitata</i> -7          | 61.63        | 54.78        | 62.04        | conserved    | conserved      | conserved     | XXXXXX       |                   |
| <i>L. capitata</i> -8          | 62.04        | 54.78        | 62.04        | conserved    | conserved      | conserved     | XXXXXX       |                   |
| <i>L. capitata</i> -9          | 61.63        | 54.78        | 62.04        | conserved    | conserved      | conserved     | XXXXXX       |                   |
| <i>L. capitata</i> -10         | 61.63        | 54.78        | 62.50        | conserved    | conserved      | conserved     | XXXXXX       |                   |
| <i>L. caraganae</i> -1-1       | 65.18        | 54.78        | 68.08        | conserved    | conserved      | conserved     | XXXXXX       |                   |
| <i>L. caraganae</i> -1-2       | 65.18        | 54.78        | 68.08        | conserved    | conserved      | conserved     | XXXXXX       |                   |
| <i>L. caraganae</i> -1-3       | 65.18        | 54.78        | 68.08        | conserved    | conserved      | conserved     | XXXXXX       |                   |
| <i>L. caraganae</i> -1-4       | 65.18        | 54.78        | 68.08        | conserved    | conserved      | conserved     | XXXXXX       |                   |
| <i>L. caraganae</i> -1-5       | 65.18        | 54.78        | 68.08        | conserved    | conserved      | conserved     | XXXXXX       |                   |
| <i>L. caraganae</i> -1-6       | 65.18        | 54.78        | 68.08        | conserved    | conserved      | conserved     | XXXXXX       |                   |
| <i>L. caraganae</i> -1-7       | 64.90        | 54.78        | 68.08        | conserved    | conserved      | conserved     | XXXXXX       |                   |
| <b><i>L. caraganae</i>-1-8</b> | <b>52.23</b> | <b>45.86</b> | <b>52.46</b> | <b>nt-12</b> | <b>nt-7,12</b> | <b>nt-7,9</b> | <b>X-X--</b> | <b>pseudogene</b> |
| <i>L. caraganae</i> -1-9       | 65.18        | 54.78        | 68.08        | conserved    | conserved      | conserved     | XXXXXX       |                   |
| <i>L. caraganae</i> -1-10      | 63.56        | 54.78        | 68.08        | conserved    | conserved      | conserved     | XXXXXX       |                   |
| <i>L. chinensis</i> -2-1       | 63.67        | 55.41        | 63.85        | conserved    | conserved      | conserved     | XXXXXX       |                   |
| <i>L. chinensis</i> -2-2       | 63.67        | 55.41        | 63.85        | conserved    | conserved      | conserved     | XXXXXX       |                   |
| <i>L. chinensis</i> -2-3       | 60.82        | 55.41        | 63.85        | conserved    | conserved      | conserved     | XXXXXX       |                   |
| <i>L. chinensis</i> -2-4       | 63.67        | 55.41        | 63.85        | conserved    | conserved      | conserved     | XXXXXX       |                   |
| <i>L. chinensis</i> -2-5       | 63.67        | 55.41        | 63.85        | conserved    | conserved      | conserved     | XXXXXX       |                   |
| <i>L. chinensis</i> -2-6       | 63.27        | 55.41        | 67.14        | conserved    | conserved      | conserved     | XXXXXX       |                   |
| <i>L. chinensis</i> -2-7       | 63.67        | 55.41        | 63.85        | conserved    | conserved      | conserved     | XXXXXX       |                   |
| <i>L. chinensis</i> -2-8       | 63.67        | 55.41        | 63.85        | conserved    | conserved      | conserved     | XXXXXX       |                   |
| <i>L. chinensis</i> -2-9       | 63.67        | 55.41        | 63.85        | conserved    | conserved      | conserved     | XXXXXX       |                   |
| <i>L. cuneata</i> -2-1         | 65.18        | 54.78        | 68.54        | conserved    | conserved      | conserved     | XXXXXX       |                   |
| <b><i>L. cuneata</i>-2-2</b>   | 65.59        | 54.78        | <b>64.79</b> | conserved    | conserved      | conserved     | XXXXXX       | <b>pseudogene</b> |
| <i>L. cuneata</i> -2-3         | 65.18        | 54.78        | 68.08        | conserved    | conserved      | conserved     | XXXXXX       |                   |
| <i>L. cuneata</i> -2-4         | 65.18        | 54.78        | 68.54        | conserved    | conserved      | conserved     | XXXXXX       |                   |
| <b><i>L. cuneata</i>-2-5</b>   | 61.18        | 52.87        | <b>61.03</b> | <b>nt-6</b>  | <b>nt-8</b>    | <b>nt-8</b>   | <b>XXX--</b> | <b>pseudogene</b> |
| <i>L. cuneata</i> -2-6         | 63.14        | 54.78        | 68.54        | conserved    | conserved      | conserved     | XXXXXX       |                   |
| <i>L. cuneata</i> -2-7         | 64.78        | 54.78        | 68.54        | conserved    | conserved      | conserved     | XXXXXX       |                   |

|                                  |              |       |              |           |             |             |        |                   |
|----------------------------------|--------------|-------|--------------|-----------|-------------|-------------|--------|-------------------|
| <i>L. cyrtobotrya</i> -1-1       | 66.27        | 54.78 | 68.08        | conserved | conserved   | conserved   | XXXXXX |                   |
| <i>L. cyrtobotrya</i> -1-2       | 66.27        | 54.78 | 68.08        | conserved | conserved   | conserved   | XXXXXX |                   |
| <i>L. cyrtobotrya</i> -1-3       | 65.87        | 55.41 | 67.61        | conserved | conserved   | conserved   | XXXXXX |                   |
| <i>L. cyrtobotrya</i> -1-4       | 65.87        | 54.78 | 68.08        | conserved | conserved   | conserved   | XXXXXX |                   |
| <i>L. cyrtobotrya</i> -1-5       | 65.87        | 54.78 | 68.54        | conserved | conserved   | conserved   | XXXXXX |                   |
| <i>L. cyrtobotrya</i> -1-6       | 65.87        | 54.78 | 68.08        | conserved | conserved   | conserved   | XXXXXX |                   |
| <i>L. cyrtobotrya</i> -1-7       | 65.87        | 54.14 | 68.08        | conserved | conserved   | conserved   | XXXXXX |                   |
| <i>L. cyrtobotrya</i> -1-8       | 66.53        | 54.78 | 68.08        | conserved | conserved   | conserved   | XXXXXX |                   |
| <i>L. cyrtobotrya</i> -3-1       | 66.00        | 54.78 | 68.08        | conserved | conserved   | conserved   | XXXXXX |                   |
| <i>L. cyrtobotrya</i> -3-2       | 66.80        | 54.78 | 68.08        | conserved | conserved   | conserved   | XXXXXX |                   |
| <i>L. cyrtobotrya</i> -3-3       | 66.80        | 54.78 | 68.08        | conserved | conserved   | conserved   | XXXXXX |                   |
| <i>L. cyrtobotrya</i> -3-4       | 66.40        | 54.78 | 68.08        | conserved | conserved   | conserved   | XXXXXX |                   |
| <b><i>L. cyrtobotrya</i>-3-5</b> | <b>63.34</b> | 55.41 | 68.54        | conserved | conserved   | <b>nt-8</b> | XXXXXX | <b>pseudogene</b> |
| <i>L. cyrtobotrya</i> -3-6       | 66.80        | 54.78 | 68.08        | conserved | conserved   | conserved   | XXXXXX |                   |
| <i>L. cyrtobotrya</i> -3-7       | 65.20        | 54.78 | 68.08        | conserved | conserved   | conserved   | XXXXXX |                   |
| <i>L. daurica</i> -2-1           | 63.71        | 54.78 | 67.61        | conserved | conserved   | conserved   | XXXXXX |                   |
| <i>L. daurica</i> -2-2           | 64.49        | 54.78 | 67.61        | conserved | conserved   | conserved   | XXXXXX |                   |
| <i>L. daurica</i> -2-3           | 63.71        | 55.41 | 67.61        | conserved | conserved   | conserved   | XXXXXX |                   |
| <i>L. daurica</i> -2-4           | 63.71        | 55.41 | 67.61        | conserved | conserved   | conserved   | XXXXXX |                   |
| <i>L. daurica</i> -2-5           | 63.71        | 54.78 | 67.61        | conserved | conserved   | conserved   | XXXXXX |                   |
| <i>L. daurica</i> -2-6           | 63.71        | 54.14 | 67.14        | conserved | conserved   | conserved   | XXXXXX |                   |
| <i>L. daurica</i> -2-7           | 63.31        | 54.78 | 67.61        | conserved | conserved   | conserved   | XXXXXX |                   |
| <i>L. daurica</i> -2-8           | 63.71        | 54.78 | 67.61        | conserved | conserved   | conserved   | XXXXXX |                   |
| <i>L. daurica</i> -2-9           | 63.71        | 54.78 | 67.61        | conserved | conserved   | conserved   | XXXXXX |                   |
| <i>L. daurica</i> -2-10          | 63.31        | 54.78 | 67.61        | conserved | conserved   | conserved   | XXXXXX |                   |
| <i>L. davidii</i> -1-1           | 66.12        | 54.78 | 68.08        | conserved | conserved   | conserved   | XXXXXX |                   |
| <i>L. davidii</i> -1-2           | 65.87        | 54.78 | 67.61        | conserved | conserved   | conserved   | XXXXXX |                   |
| <i>L. davidii</i> -1-3           | 65.71        | 54.78 | 68.08        | conserved | conserved   | conserved   | XXXXXX |                   |
| <i>L. davidii</i> -1-4           | 65.71        | 54.78 | 68.08        | conserved | conserved   | conserved   | XXXXXX |                   |
| <i>L. davidii</i> -1-5           | 66.12        | 54.78 | 68.08        | conserved | conserved   | conserved   | XXXXXX |                   |
| <i>L. davidii</i> -1-6           | 64.90        | 54.78 | 68.08        | conserved | conserved   | conserved   | XXXXXX |                   |
| <i>L. davidii</i> -1-7           | 64.90        | 54.78 | 68.08        | conserved | conserved   | conserved   | XXXXXX |                   |
| <i>L. davidii</i> -1-8           | 66.12        | 54.78 | 67.61        | conserved | conserved   | conserved   | XXXXXX |                   |
| <i>L. davidii</i> -2-1           | 65.59        | 54.78 | 68.54        | conserved | conserved   | conserved   | XXXXXX |                   |
| <i>L. davidii</i> -2-2           | 65.59        | 54.78 | 68.08        | conserved | conserved   | conserved   | XXXXXX |                   |
| <i>L. davidii</i> -2-3           | 65.59        | 54.78 | 68.08        | conserved | conserved   | conserved   | XXXXXX |                   |
| <i>L. davidii</i> -2-4           | 65.59        | 54.78 | 68.08        | conserved | conserved   | conserved   | XXXXXX |                   |
| <i>L. davidii</i> -2-5           | 65.59        | 54.78 | 68.08        | conserved | conserved   | conserved   | XXXXXX |                   |
| <i>L. davidii</i> -2-6           | 65.59        | 54.78 | 68.08        | conserved | conserved   | conserved   | XXXXXX |                   |
| <i>L. davidii</i> -2-7           | 65.31        | 54.78 | 68.08        | conserved | conserved   | conserved   | XXXXXX |                   |
| <i>L. davidii</i> -2-8           | 65.20        | 54.78 | 68.54        | conserved | conserved   | conserved   | XXXXXX |                   |
| <i>L. dunnii</i> -1              | 63.22        | 55.41 | 66.20        | conserved | conserved   | conserved   | XXXXXX |                   |
| <b><i>L. dunnii</i>-2</b>        | 63.22        | 55.41 | <b>62.39</b> | conserved | conserved   | conserved   | XXXXXX | <b>pseudogene</b> |
| <i>L. dunnii</i> -3              | 62.40        | 55.41 | 66.20        | conserved | conserved   | conserved   | XXXXXX |                   |
| <i>L. dunnii</i> -4              | 62.81        | 55.41 | 66.20        | conserved | conserved   | conserved   | XXXXXX |                   |
| <i>L. dunnii</i> -5              | 62.81        | 55.41 | 65.73        | conserved | conserved   | conserved   | XXXXXX |                   |
| <b><i>L. dunnii</i>-6</b>        | <b>59.49</b> | 55.41 | 64.79        | conserved | <b>nt-6</b> | conserved   | XXXXXX | <b>pseudogene</b> |
| <i>L. dunnii</i> -7              | 62.81        | 55.41 | 65.73        | conserved | conserved   | conserved   | XXXXXX |                   |
| <i>L. dunnii</i> -8              | 62.81        | 56.05 | 64.79        | conserved | conserved   | conserved   | XXXXXX |                   |
| <i>L. dunnii</i> -9              | 62.81        | 55.41 | 66.67        | conserved | conserved   | conserved   | XXXXXX |                   |
| <i>L. fasciculiflora</i> -1      | 65.71        | 54.78 | 67.61        | conserved | conserved   | conserved   | XXXXXX |                   |



|                               |              |              |              |                    |                |                  |              |                   |
|-------------------------------|--------------|--------------|--------------|--------------------|----------------|------------------|--------------|-------------------|
| <i>L. fasciculiflora-2</i>    | 65.71        | 54.78        | 67.61        | conserved          | conserved      | conserved        | XXXXXX       |                   |
| <i>L. fasciculiflora-3</i>    | 65.71        | 54.78        | 67.61        | conserved          | conserved      | conserved        | XXXXXX       |                   |
| <i>L. fasciculiflora-4</i>    | 65.71        | 54.78        | 67.61        | conserved          | conserved      | conserved        | XXXXXX       |                   |
| <i>L. fasciculiflora-5</i>    | 65.71        | 54.78        | 63.85        | conserved          | conserved      | conserved        | XXXXXX       |                   |
| <i>L. fasciculiflora-6</i>    | 66.12        | 54.78        | 67.61        | conserved          | conserved      | conserved        | XXXXXX       |                   |
| <i>L. fasciculiflora-7</i>    | 65.71        | 54.14        | 67.61        | conserved          | conserved      | conserved        | XXXXXX       |                   |
| <i>L. fasciculiflora-8</i>    | 65.71        | 53.80        | 67.61        | conserved          | conserved      | conserved        | XXXXXX       |                   |
| <i>L. fasciculiflora-9</i>    | 65.71        | 54.78        | 67.61        | conserved          | conserved      | conserved        | XXXXXX       |                   |
| <i>L. floribunda-2-1</i>      | 63.18        | 55.41        | 65.14        | conserved          | conserved      | conserved        | XXXXXX       |                   |
| <i>L. floribunda-2-2</i>      | 63.18        | 55.41        | 64.68        | conserved          | conserved      | conserved        | XXXXXX       |                   |
| <i>L. floribunda-2-3</i>      | 63.18        | 55.41        | 64.68        | conserved          | conserved      | conserved        | XXXXXX       |                   |
| <i>L. floribunda-2-4</i>      | 63.18        | 55.41        | 64.68        | conserved          | conserved      | conserved        | XXXXXX       |                   |
| <i>L. floribunda-2-5</i>      | 63.18        | 55.41        | 64.68        | conserved          | conserved      | conserved        | XXXXXX       |                   |
| <i>L. floribunda-2-6</i>      | 63.18        | 55.41        | 64.38        | conserved          | conserved      | conserved        | XXXXXX       |                   |
| <i>L. floribunda-2-7</i>      | 63.18        | 55.41        | 65.14        | conserved          | conserved      | conserved        | XXXXXX       |                   |
| <i>L. floribunda-2-8</i>      | 63.18        | 55.41        | 64.68        | conserved          | conserved      | conserved        | XXXXXX       |                   |
| <i>L. floribunda-2-9</i>      | 63.18        | 55.41        | 64.68        | conserved          | conserved      | conserved        | XXXXXX       |                   |
| <i>L. fordii-2-1</i>          | 62.45        | 54.78        | 66.05        | conserved          | conserved      | conserved        | XXXXXX       |                   |
| <i>L. fordii-2-2</i>          | 65.45        | 54.78        | 65.12        | conserved          | conserved      | conserved        | XXXXXX       |                   |
| <i>L. fordii-2-3</i>          | 65.45        | 56.05        | 66.05        | conserved          | conserved      | conserved        | XXXXXX       |                   |
| <i>L. fordii-2-4</i>          | 65.31        | 55.41        | 65.58        | conserved          | conserved      | conserved        | XXXXXX       |                   |
| <i>L. fordii-2-5</i>          | 65.85        | 55.41        | 66.05        | conserved          | conserved      | conserved        | XXXXXX       |                   |
| <b><i>L. fordii-2-6</i></b>   | <b>52.05</b> | <b>47.77</b> | <b>51.64</b> | <b>nt-16</b>       | <b>nt-6,7</b>  | <b>nt-2,7</b>    | ----         | <b>pseudogene</b> |
| <i>L. fordii-2-7</i>          | 63.45        | 54.78        | 64.79        | conserved          | conserved      | conserved        | XXXXXX       |                   |
| <b><i>L. fordii-2-8</i></b>   | <b>46.55</b> | <b>41.76</b> | <b>46.43</b> | <b>nt-1,12, 16</b> | <b>nt-6,14</b> | <b>nt-8,9,10</b> | X---         | <b>pseudogene</b> |
| <b><i>L. fordii-2-9</i></b>   | <b>51.64</b> | <b>47.77</b> | <b>51.64</b> | <b>nt-16</b>       | <b>nt-6,7</b>  | <b>nt-2,7</b>    | ----         | <b>pseudogene</b> |
| <i>L. formosa-1-1</i>         | 64.92        | 54.78        | 68.08        | conserved          | conserved      | conserved        | XXXXXX       |                   |
| <b><i>L. formosa-1-2</i></b>  | <b>47.41</b> | <b>41.24</b> | <b>47.88</b> | <b>nt-9,12, 16</b> | <b>nt-6,14</b> | <b>nt-8,9,10</b> | ----         | <b>pseudogene</b> |
| <i>L. formosa-1-3</i>         | 64.75        | 54.14        | 67.61        | conserved          | conserved      | conserved        | XXXXXX       |                   |
| <i>L. formosa-1-4</i>         | 64.92        | 54.78        | 68.08        | conserved          | conserved      | conserved        | XXXXXX       |                   |
| <i>L. formosa-1-5</i>         | 64.92        | 54.78        | 67.61        | conserved          | conserved      |                  | XXXXXX       |                   |
| <b><i>L. formosa-1-6</i></b>  | 63.11        | <b>52.87</b> | <b>63.85</b> | conserved          | <b>nt-6</b>    | conserved        | XXXXXX       | <b>pseudogene</b> |
| <i>L. formosa-1-7</i>         | 65.73        | 54.78        | 67.61        | conserved          | conserved      | conserved        | XXXXXX       |                   |
| <i>L. formosa-1-8</i>         | 64.92        | 54.78        | 68.08        | conserved          | conserved      | conserved        | XXXXXX       |                   |
| <i>L. formosa-1-9</i>         | 64.92        | 54.78        | 68.08        | conserved          | conserved      | conserved        | XXXXXX       |                   |
| <b><i>L. formosa-1-10</i></b> | <b>60.25</b> | <b>50.96</b> | <b>61.03</b> | conserved          | conserved      | <b>nt-9</b>      | <b>XX--</b>  | <b>pseudogene</b> |
| <i>L. formosa-2-1</i>         | 64.92        | 54.78        | 68.08        | conserved          | conserved      | conserved        | XXXXXX       |                   |
| <i>L. formosa-2-2</i>         | 65.32        | 54.78        | 68.08        | conserved          | conserved      | conserved        | XXXXXX       |                   |
| <i>L. formosa-2-3</i>         | 64.92        | 54.78        | 68.08        | conserved          | conserved      | conserved        | XXXXXX       |                   |
| <i>L. formosa-2-4</i>         | 65.73        | 54.78        | 68.54        | conserved          | conserved      | conserved        | XXXXXX       |                   |
| <i>L. formosa-2-5</i>         | 64.92        | 54.78        | 67.61        | conserved          | conserved      | conserved        | XXXXXX       |                   |
| <i>L. formosa-2-6</i>         | 63.31        | 54.14        | 68.08        | conserved          | conserved      | conserved        | XXXXXX       |                   |
| <i>L. formosa-2-7</i>         | 64.92        | 54.78        | 68.08        | conserved          | conserved      | conserved        | XXXXXX       |                   |
| <i>L. formosa-2-8</i>         | 65.73        | 54.78        | 68.08        | conserved          | conserved      | conserved        | XXXXXX       |                   |
| <i>L. formosa-2-9</i>         | 64.92        | 54.14        | 67.61        | conserved          | conserved      | conserved        | XXXXXX       |                   |
| <i>L. formosa-2-10</i>        | 65.32        | 53.50        | 66.67        | conserved          | conserved      | conserved        | XXXXXX       |                   |
| <i>L. formosa-4-1</i>         | 65.87        | 54.78        | 68.08        | conserved          | conserved      | conserved        | XXXXXX       |                   |
| <i>L. formosa-4-2</i>         | 66.27        | 54.78        | 67.61        | conserved          | conserved      | conserved        | XXXXXX       |                   |
| <b><i>L. formosa-4-3</i></b>  | 63.11        | 53.50        | 65.10        | conserved          | <b>nt-7</b>    | <b>nt-1</b>      | <b>-XXXX</b> | <b>pseudogene</b> |
| <i>L. formosa-4-4</i>         | 64.14        | 54.78        | 67.14        | conserved          | conserved      | conserved        | XXXXXX       |                   |
| <i>L. formosa-4-5</i>         | 66.13        | 54.78        | 68.08        | conserved          | conserved      | conserved        | XXXXXX       |                   |

|                                  |              |              |              |              |             |             |              |                   |
|----------------------------------|--------------|--------------|--------------|--------------|-------------|-------------|--------------|-------------------|
| <i>L. formosa</i> -4-6           | 64.94        | 54.78        | 67.61        | conserved    | conserved   | conserved   | XXXXXX       |                   |
| <i>L. formosa</i> -4-7           | 67.06        | 54.78        | 67.61        | conserved    | conserved   | conserved   | XXXXXX       |                   |
| <i>L. formosa</i> -4-8           | 64.92        | 55.41        | 68.08        | conserved    | conserved   | conserved   | XXXXXX       |                   |
| <i>L. formosa</i> -4-9           | 66.27        | 54.78        | 67.61        | conserved    | conserved   | conserved   | XXXXXX       |                   |
| <i>L. formosa</i> -4-10          | 64.54        | 54.78        | 68.08        | conserved    | conserved   | conserved   | XXXXXX       |                   |
| <b><i>L. formosa</i>-5-1</b>     | <b>57.74</b> | <b>49.68</b> | <b>57.75</b> | conserved    | <b>nt-7</b> | <b>nt-7</b> | <b>XX-X</b>  | <b>pseudogene</b> |
| <i>L. formosa</i> -5-2           | 65.46        | 54.78        | 68.08        | conserved    | conserved   | conserved   | XXXXXX       |                   |
| <i>L. formosa</i> -5-3           | 65.86        | 54.14        | 67.61        | conserved    | conserved   | conserved   | XXXXXX       |                   |
| <i>L. formosa</i> -5-4           | 64.92        | 54.78        | 68.08        | conserved    | conserved   | conserved   | XXXXXX       |                   |
| <i>L. formosa</i> -5-5           | 65.86        | 54.78        | 67.61        | conserved    | conserved   | conserved   | XXXXXX       |                   |
| <i>L. formosa</i> -5-6           | 65.32        | 54.78        | 68.54        | conserved    | conserved   | conserved   | XXXXXX       |                   |
| <i>L. formosa</i> -5-7           | 65.32        | 54.78        | 67.61        | conserved    | conserved   | conserved   | XXXXXX       |                   |
| <i>L. formosa</i> -5-8           | 65.32        | 54.78        | 68.08        | conserved    | conserved   | conserved   | XXXXXX       |                   |
| <b><i>L. formosa</i>-5-9</b>     | <b>58.51</b> | <b>51.28</b> | <b>59.62</b> | <b>nt-14</b> | conserved   | <b>nt-4</b> | <b>XX-X-</b> | <b>pseudogene</b> |
| <b><i>L. formosa</i>-5-10</b>    | <b>58.51</b> | <b>51.28</b> | <b>59.62</b> | <b>nt-14</b> | conserved   | <b>nt-4</b> | <b>XX-X-</b> | <b>pseudogene</b> |
| <i>L. forrestii</i> -1           | 66.26        | 54.78        | 66.05        | conserved    | conserved   | conserved   | XXXXXX       |                   |
| <i>L. forrestii</i> -2           | 65.85        | 54.78        | 66.51        | conserved    | conserved   | conserved   | XXXXXX       |                   |
| <i>L. forrestii</i> -3           | 66.26        | 54.78        | 66.05        | conserved    | conserved   | conserved   | XXXXXX       |                   |
| <i>L. forrestii</i> -4           | 65.85        | 54.78        | 66.05        | conserved    | conserved   | conserved   | XXXXXX       |                   |
| <i>L. forrestii</i> -5           | 66.85        | 54.78        | 66.05        | conserved    | conserved   | conserved   | XXXXXX       |                   |
| <i>L. forrestii</i> -6           | 65.85        | 54.78        | 66.05        | conserved    | conserved   | conserved   | XXXXXX       |                   |
| <i>L. forrestii</i> -7           | 66.67        | 54.78        | 66.05        | conserved    | conserved   | conserved   | XXXXXX       |                   |
| <i>L. forrestii</i> -8           | 65.85        | 54.78        | 66.05        | conserved    | conserved   | conserved   | XXXXXX       |                   |
| <i>L. forrestii</i> -9           | 66.26        | 54.78        | 66.05        | conserved    | conserved   | conserved   | XXXXXX       |                   |
| <i>L. hengduanshan ensis</i> -1  | 64.63        | 54.14        | 66.04        | conserved    | conserved   | conserved   | XXXXXX       |                   |
| <i>L. hengduanshan ensis</i> -2  | 64.63        | 54.78        | 66.20        | conserved    | conserved   | conserved   | XXXXXX       |                   |
| <i>L. hengduanshan ensis</i> -3  | 65.04        | 55.41        | 65.73        | conserved    | conserved   | conserved   | XXXXXX       |                   |
| <i>L. hengduanshan ensis</i> -4  | 64.63        | 55.41        | 65.73        | conserved    | conserved   | conserved   | XXXXXX       |                   |
| <i>L. hengduanshan ensis</i> -5  | 64.63        | 54.78        | 66.20        | conserved    | conserved   | conserved   | XXXXXX       |                   |
| <i>L. hengduanshan ensis</i> -6  | 65.04        | 54.78        | 66.20        | conserved    | conserved   | conserved   | XXXXXX       |                   |
| <i>L. hengduanshan ensis</i> -7  | 64.63        | 54.78        | 66.20        | conserved    | conserved   | conserved   | XXXXXX       |                   |
| <i>L. hengduanshan ensis</i> -8  | 63.01        | 54.78        | 66.20        | conserved    | conserved   | conserved   | XXXXXX       |                   |
| <i>L. hengduanshan ensis</i> -9  | 64.63        | 54.78        | 66.20        | conserved    | conserved   | conserved   | XXXXXX       |                   |
| <i>L. hengduanshan ensis</i> -10 | 63.82        | 54.78        | 65.73        | conserved    | conserved   | conserved   | XXXXXX       |                   |
| <i>L. hirta</i> -1               | 61.22        | 54.78        | 64.35        | conserved    | conserved   | conserved   | XXXXXX       |                   |
| <i>L. hirta</i> -2               | 61.22        | 54.78        | 64.35        | conserved    | conserved   | conserved   | XXXXXX       |                   |
| <i>L. hirta</i> -3               | 61.22        | 54.78        | 64.35        | conserved    | conserved   | conserved   | XXXXXX       |                   |
| <i>L. hirta</i> -4               | 61.22        | 54.78        | 64.35        | conserved    | conserved   | conserved   | XXXXXX       |                   |
| <i>L. hirta</i> -5               | 61.22        | 54.78        | 64.35        | conserved    | conserved   | conserved   | XXXXXX       |                   |
| <i>L. hirta</i> -6               | 61.22        | 54.78        | 63.89        | conserved    | conserved   | conserved   | XXXXXX       |                   |
| <i>L. hirta</i> -7               | 61.22        | 54.78        | 63.89        | conserved    | conserved   | conserved   | XXXXXX       |                   |
| <i>L. hirta</i> -8               | 61.22        | 54.78        | 64.35        | conserved    | conserved   | conserved   | XXXXXX       |                   |

|                                   |              |              |              |              |             |                    |              |                   |
|-----------------------------------|--------------|--------------|--------------|--------------|-------------|--------------------|--------------|-------------------|
| <i>L. hirta-9</i>                 | 61.22        | 54.78        | 64.35        | conserved    | conserved   | conserved          | XXXXX        |                   |
| <i>L. hispida-1</i>               | 65.86        | 55.41        | 69.48        | conserved    | conserved   | conserved          | XXXXX        |                   |
| <i>L. hispida-2</i>               | 65.86        | 55.41        | 69.48        | conserved    | conserved   | conserved          | XXXXX        |                   |
| <i>L. hispida-3</i>               | 65.86        | 55.41        | 69.48        | conserved    | conserved   | conserved          | XXXXX        |                   |
| <i>L. hispida-4</i>               | 65.86        | 55.41        | 69.01        | conserved    | conserved   | conserved          | XXXXX        |                   |
| <i>L. hispida-5</i>               | 65.86        | 55.41        | 69.48        | conserved    | conserved   | conserved          | XXXXX        |                   |
| <i>L. hispida-6</i>               | 65.86        | 56.05        | 69.48        | conserved    | conserved   | conserved          | XXXXX        |                   |
| <i>L. hispida-7</i>               | 65.86        | 55.41        | 69.48        | conserved    | conserved   | conserved          | XXXXX        |                   |
| <i>L. hispida-8</i>               | 66.27        | 55.41        | 69.48        | conserved    | conserved   | conserved          | XXXXX        |                   |
| <i>L. homoloba-1</i>              | 65.20        | 54.78        | 67.61        | conserved    | conserved   | conserved          | XXXXX        |                   |
| <i>L. homoloba-2</i>              | 65.20        | 54.78        | 67.61        | conserved    | conserved   | conserved          | XXXXX        |                   |
| <i>L. homoloba-3</i>              | 65.60        | 54.78        | 67.61        | conserved    | conserved   | conserved          | XXXXX        |                   |
| <i>L. homoloba-4</i>              | 65.60        | 54.78        | 67.61        | conserved    | conserved   | conserved          | XXXXX        |                   |
| <i>L. homoloba-5</i>              | 65.20        | 54.78        | 67.61        | conserved    | conserved   | conserved          | XXXXX        |                   |
| <i>L. homoloba-6</i>              | 65.20        | 54.78        | 68.08        | conserved    | conserved   | conserved          | XXXXX        |                   |
| <i>L. homoloba-7</i>              | 65.20        | 54.78        | 67.61        | conserved    | conserved   | conserved          | XXXXX        |                   |
| <i>L. homoloba-8</i>              | 65.20        | 54.78        | 67.61        | conserved    | conserved   | conserved          | XXXXX        |                   |
| <i>L. homoloba-9</i>              | 65.20        | 54.78        | 67.61        | conserved    | conserved   | conserved          | XXXXX        |                   |
| <i>L. inschnica-2-1</i>           | 63.71        | 54.78        | 66.67        | conserved    | conserved   | conserved          | XXXXX        |                   |
| <b><i>L. inschnica-2-2</i></b>    | <b>61.48</b> | <b>52.23</b> | <b>63.85</b> | conserved    | <b>nt-7</b> | <b>nt-8</b>        | <b>XXX-X</b> | <b>pseudogene</b> |
| <i>L. inschnica-2-3</i>           | 63.71        | 54.78        | 66.67        | conserved    | conserved   | conserved          | XXXXX        |                   |
| <i>L. inschnica-2-4</i>           | 63.71        | 54.78        | 66.67        | conserved    | conserved   | conserved          | XXXXX        |                   |
| <i>L. inschnica-2-5</i>           | 63.71        | 54.78        | 66.67        | conserved    | conserved   | conserved          | XXXXX        |                   |
| <i>L. inschnica-2-6</i>           | 63.71        | 55.41        | 66.67        | conserved    | conserved   | conserved          | XXXXX        |                   |
| <i>L. inschnica-2-7</i>           | 63.71        | 54.78        | 66.67        | conserved    | conserved   | conserved          | XXXXX        |                   |
| <i>L. inschnica-2-8</i>           | 63.71        | 54.78        | 66.67        | conserved    | conserved   | conserved          | XXXXX        |                   |
| <i>L. inschnica-2-9</i>           | 63.71        | 54.78        | 67.14        | conserved    | conserved   | conserved          | XXXXX        |                   |
| <i>L. inschnica-2-10</i>          | 64.11        | 54.78        | 66.67        | conserved    | conserved   | conserved          | XXXXX        |                   |
| <i>L. intermedia-1</i>            | 63.37        | 54.78        | 63.38        | conserved    | conserved   | conserved          | XXXXX        |                   |
| <i>L. intermedia-2</i>            | 62.96        | 53.50        | 63.85        | conserved    | conserved   | conserved          | XXXXX        |                   |
| <i>L. intermedia-3</i>            | 62.96        | 54.78        | 63.38        | conserved    | conserved   | conserved          | XXXXX        |                   |
| <i>L. intermedia-4</i>            | 62.96        | 54.78        | 63.38        | conserved    | conserved   | conserved          | XXXXX        |                   |
| <i>L. intermedia-5</i>            | 62.55        | 54.78        | 63.38        | conserved    | conserved   | conserved          | XXXXX        |                   |
| <i>L. intermedia-6</i>            | 63.37        | 54.78        | 63.38        | conserved    | conserved   | conserved          | XXXXX        |                   |
| <i>L. intermedia-7</i>            | 62.96        | 54.78        | 63.38        | conserved    | conserved   | conserved          | XXXXX        |                   |
| <i>L. intermedia-8</i>            | 62.96        | 54.78        | 63.38        | conserved    | conserved   | conserved          | XXXXX        |                   |
| <i>L. intermedia-9</i>            | 62.96        | 53.50        | 63.85        | conserved    | conserved   | conserved          | XXXXX        |                   |
| <i>L. intermedia-10</i>           | 62.96        | 54.78        | 63.38        | conserved    | conserved   | conserved          | XXXXX        |                   |
| <i>L. intermedia-11</i>           | 62.96        | 54.78        | 63.38        | conserved    | conserved   | conserved          | XXXXX        |                   |
| <b><i>L. jiangxiensis-1-1</i></b> | <b>58.61</b> | <b>50.96</b> | <b>59.62</b> | <b>nt-16</b> | conserved   | <b>conserved</b>   | <b>XXXX-</b> | <b>pseudogene</b> |
| <i>L. jiangxiensis-1-2</i>        | 64.78        | 54.78        | 67.61        | conserved    | conserved   | conserved          | XXXXX        |                   |
| <i>L. jiangxiensis-1-3</i>        | 64.78        | 54.78        | 65.26        | conserved    | conserved   | conserved          | XXXXX        |                   |
| <i>L. jiangxiensis-1-4</i>        | 64.78        | 54.78        | 66.67        | conserved    | conserved   | conserved          | XXXXX        |                   |
| <i>L. jiangxiensis-1-5</i>        | 64.78        | 54.78        | 66.67        | conserved    | conserved   | conserved          | XXXXX        |                   |
| <b><i>L. jiangxiensis-1-6</i></b> | <b>58.61</b> | 54.03        | 66.67        | conserved    | <b>nt-1</b> | <b>all missing</b> | <b>XXX--</b> | <b>pseudogene</b> |
| <i>L. jiangxiensis-1-7</i>        | 65.18        | 54.78        | 68.08        | conserved    | conserved   | conserved          | XXXXX        |                   |
| <i>L. jiangxiensis-1-8</i>        | 64.78        | 54.78        | 66.67        | conserved    | conserved   | conserved          | XXXXX        |                   |
| <i>L. jiangxiensis-1-9</i>        | 64.78        | 54.78        | 66.67        | conserved    | conserved   | conserved          | XXXXX        |                   |
| <i>L. jiangxiensis-1-10</i>       | 65.18        | 54.78        | 68.08        | conserved    | conserved   | conserved          | XXXXX        |                   |
| <i>L. jiangxiensis-2-1</i>        | 64.37        | 54.78        | 66.67        | conserved    | conserved   | conserved          | XXXXX        |                   |
| <i>L. jiangxiensis-2-2</i>        | 64.78        | 54.78        | 66.67        | conserved    | conserved   | conserved          | XXXXX        |                   |

|                                   |              |              |              |              |             |                  |              |                   |
|-----------------------------------|--------------|--------------|--------------|--------------|-------------|------------------|--------------|-------------------|
| <i>L. jiangxiensis</i> -2-3       | 64.78        | 54.78        | 66.67        | conserved    | conserved   | conserved        | XXXXXX       |                   |
| <i>L. jiangxiensis</i> -2-4       | 64.78        | 54.78        | 67.14        | conserved    | conserved   | conserved        | XXXXXX       |                   |
| <b><i>L. jiangxiensis</i>-2-5</b> | 64.78        | 54.78        | <b>63.38</b> | conserved    | conserved   | conserved        | XXXXXX       | <b>pseudogene</b> |
| <i>L. jiangxiensis</i> -2-6       | 65.18        | 54.78        | 68.54        | conserved    | conserved   | conserved        | XXXXXX       |                   |
| <i>L. jiangxiensis</i> -2-7       | 65.18        | 54.78        | 68.54        | conserved    | conserved   | conserved        | XXXXXX       |                   |
| <i>L. jiangxiensis</i> -2-8       | 64.98        | 54.78        | 67.96        | conserved    | conserved   | conserved        | XXXXXX       |                   |
| <i>L. jiangxiensis</i> -2-9       | 65.59        | 54.78        | 68.54        | conserved    | conserved   | conserved        | XXXXXX       |                   |
| <i>L. jiangxiensis</i> -2-10      | 65.18        | 54.78        | 66.20        | conserved    | conserved   | conserved        | XXXXXX       |                   |
| <i>L. juncea</i> -3-1             | 64.52        | 54.78        | 66.67        | conserved    | conserved   | conserved        | XXXXXX       |                   |
| <i>L. juncea</i> -3-2             | 63.71        | 54.78        | 66.67        | conserved    | conserved   | conserved        | XXXXXX       |                   |
| <i>L. juncea</i> -3-3             | 63.71        | 54.78        | 66.67        | conserved    | conserved   | conserved        | XXXXXX       |                   |
| <i>L. juncea</i> -3-4             | 63.71        | 54.78        | 66.67        | conserved    | conserved   | conserved        | XXXXXX       |                   |
| <i>L. juncea</i> -3-5             | 63.31        | 54.78        | 66.20        | conserved    | conserved   | conserved        | XXXXXX       |                   |
| <i>L. juncea</i> -3-6             | 63.71        | 54.78        | 66.67        | conserved    | conserved   | conserved        | XXXXXX       |                   |
| <i>L. lichiyuniae</i> -3-1        | 65.18        | 54.78        | 68.08        | conserved    | conserved   | conserved        | XXXXXX       |                   |
| <i>L. lichiyuniae</i> -3-2        | 65.18        | 54.78        | 68.08        | conserved    | conserved   | conserved        | XXXXXX       |                   |
| <i>L. lichiyuniae</i> -3-3        | 65.18        | 54.78        | 67.61        | conserved    | conserved   | conserved        | XXXXXX       |                   |
| <i>L. lichiyuniae</i> -3-4        | 64.78        | 54.78        | 68.08        | conserved    | conserved   | conserved        | XXXXXX       |                   |
| <b><i>L. lichiyuniae</i>-3-5</b>  | <b>60.08</b> | <b>51.59</b> | <b>58.69</b> | <b>nt-16</b> | <b>nt-7</b> | <b>conserved</b> | XXXXXX       | <b>pseudogene</b> |
| <i>L. lichiyuniae</i> -3-6        | 64.78        | 54.78        | 68.08        | conserved    | conserved   | conserved        | XXXXXX       |                   |
| <i>L. lichiyuniae</i> -3-7        | 65.18        | 54.78        | 68.08        | conserved    | conserved   | conserved        | XXXXXX       |                   |
| <b><i>L. lichiyuniae</i>-3-8</b>  | 65.18        | 54.78        | <b>60.09</b> | conserved    | conserved   | conserved        | <b>XXXX-</b> | <b>pseudogene</b> |
| <i>L. lichiyuniae</i> -3-9        | 65.18        | 54.78        | 68.08        | conserved    | conserved   | conserved        | XXXXXX       |                   |
| <i>L. lichiyuniae</i> -3-10       | 64.78        | 54.78        | 68.08        | conserved    | conserved   | conserved        | XXXXXX       |                   |
| <i>L. maximowiczii</i> -1-1       | 65.32        | 54.78        | 68.08        | conserved    | conserved   | conserved        | XXXXXX       |                   |
| <i>L. maximowiczii</i> -1-2       | 66.27        | 54.78        | 68.08        | conserved    | conserved   | conserved        | XXXXXX       |                   |
| <i>L. maximowiczii</i> -1-3       | 66.27        | 54.78        | 67.61        | conserved    | conserved   | conserved        | XXXXXX       |                   |
| <i>L. maximowiczii</i> -1-4       | 66.67        | 54.78        | 68.08        | conserved    | conserved   | conserved        | XXXXXX       |                   |
| <i>L. maximowiczii</i> -1-5       | 66.27        | 54.78        | 68.08        | conserved    | conserved   | conserved        | XXXXXX       |                   |
| <i>L. maximowiczii</i> -1-6       | 65.73        | 54.78        | 68.08        | conserved    | conserved   | conserved        | XXXXXX       |                   |
| <i>L. maximowiczii</i> -1-7       | 66.27        | 54.78        | 68.08        | conserved    | conserved   | conserved        | XXXXXX       |                   |
| <i>L. maximowiczii</i> -1-8       | 66.27        | 54.78        | 68.08        | conserved    | conserved   | conserved        | XXXXXX       |                   |
| <i>L. maximowiczii</i> -2-1       | 65.87        | 54.78        | 68.08        | conserved    | conserved   | conserved        | XXXXXX       |                   |
| <i>L. maximowiczii</i> -2-2       | 66.27        | 54.78        | 68.08        | conserved    | conserved   | conserved        | XXXXXX       |                   |
| <i>L. maximowiczii</i> -2-3       | 64.92        | 54.78        | 68.08        | conserved    | conserved   | conserved        | XXXXXX       |                   |
| <i>L. maximowiczii</i> -2-4       | 66.27        | 54.78        | 68.08        | conserved    | conserved   | conserved        | XXXXXX       |                   |
| <i>L. maximowiczii</i> -2-5       | 66.00        | 54.78        | 68.54        | conserved    | conserved   | conserved        | XXXXXX       |                   |
| <i>L. maximowiczii</i> -2-6       | 65.87        | 54.78        | 68.54        | conserved    | conserved   | conserved        | XXXXXX       |                   |
| <i>L. maximowiczii</i> -2-7       | 65.87        | 54.78        | 68.08        | conserved    | conserved   | conserved        | XXXXXX       |                   |
| <i>L. maximowiczii</i> -2-8       | 66.27        | 54.78        | 68.08        | conserved    | conserved   | conserved        | XXXXXX       |                   |
| <i>L. maximowiczii</i> -2-9       | 64.92        | 54.78        | 68.08        | conserved    | conserved   | conserved        | XXXXXX       |                   |
| <i>L. maximowiczii</i> -2-10      | 66.67        | 54.78        | 68.08        | conserved    | conserved   | conserved        | XXXXXX       |                   |
| <i>L. melanantha</i> -1           | 66.40        | 54.78        | 68.08        | conserved    | conserved   | conserved        | XXXXXX       |                   |
| <i>L. melanantha</i> -2           | 66.40        | 55.41        | 68.08        | conserved    | conserved   | conserved        | XXXXXX       |                   |
| <i>L. melanantha</i> -3           | 66.40        | 54.78        | 68.08        | conserved    | conserved   | conserved        | XXXXXX       |                   |
| <i>L. melanantha</i> -4           | 66.40        | 54.78        | 68.08        | conserved    | conserved   | conserved        | XXXXXX       |                   |
| <i>L. melanantha</i> -5           | 66.40        | 54.78        | 68.08        | conserved    | conserved   | conserved        | XXXXXX       |                   |
| <i>L. melanantha</i> -6           | 66.40        | 54.78        | 68.08        | conserved    | conserved   | conserved        | XXXXXX       |                   |
| <i>L. melanantha</i> -7           | 66.40        | 54.78        | 68.08        | conserved    | conserved   | conserved        | XXXXXX       |                   |
| <i>L. patens</i> -1               | 65.06        | 54.78        | 68.08        | conserved    | conserved   | conserved        | XXXXXX       |                   |

|                         |              |              |              |                         |                    |                  |              |                   |
|-------------------------|--------------|--------------|--------------|-------------------------|--------------------|------------------|--------------|-------------------|
| <i>L. patens-2</i>      | <b>61.63</b> | 54.14        | <b>64.32</b> | conserved               | conserved          | conserved        | XXXXX        | <b>pseudogene</b> |
| <i>L. patens-3</i>      | 65.85        | 55.41        | 67.14        | conserved               | conserved          | conserved        | XXXXX        |                   |
| <i>L. patens-4</i>      | <b>57.74</b> | 54.14        | <b>61.03</b> | conserved               | conserved          | conserved        | XXXX-        | <b>pseudogene</b> |
| <i>L. patens-5</i>      | <b>56.49</b> | <b>59.18</b> | <b>60.09</b> | <b>missing<br/>4-16</b> | <b>all missing</b> | <b>nt-2</b>      | ---XX        | <b>pseudogene</b> |
| <i>L. patens-6</i>      | <b>58.09</b> | <b>49.68</b> | <b>57.28</b> | <b>nt-16</b>            | conserved          | <b>nt-7</b>      | <b>XX-XX</b> | <b>pseudogene</b> |
| <i>L. patens-7</i>      | 65.32        | 54.78        | 68.08        | conserved               | conserved          | conserved        | XXXXX        |                   |
| <i>L. patens-8</i>      | 65.18        | 55.41        | 68.08        | conserved               | conserved          | conserved        | XXXXX        |                   |
| <i>L. patens-9</i>      | 64.92        | 54.78        | 67.61        | conserved               | conserved          | conserved        | XXXXX        |                   |
| <i>L. patens-10</i>     | <b>54.20</b> | <b>42.31</b> | <b>47.02</b> | <b>nt-9,12,16</b>       | <b>nt-6,14</b>     | <b>nt-8,9,10</b> | ----         | <b>pseudogene</b> |
| <i>L. pilosa-1</i>      | 64.78        | 54.78        | 67.14        | conserved               | conserved          | conserved        | XXXXX        |                   |
| <i>L. pilosa-2</i>      | 64.78        | 54.78        | 66.67        | conserved               | conserved          | conserved        | XXXXX        |                   |
| <i>L. pilosa-3</i>      | 64.78        | 54.78        | 67.14        | conserved               | conserved          | conserved        | XXXXX        |                   |
| <i>L. pilosa-4</i>      | 64.78        | 54.78        | 66.67        | conserved               | conserved          | conserved        | XXXXX        |                   |
| <i>L. pilosa-5</i>      | 64.78        | 54.78        | 66.67        | conserved               | conserved          | conserved        | XXXXX        |                   |
| <i>L. pilosa-6</i>      | 64.78        | 54.78        | 66.67        | conserved               | conserved          | conserved        | XXXXX        |                   |
| <i>L. pilosa-7</i>      | 65.18        | 54.78        | 66.67        | conserved               | conserved          | conserved        | XXXXX        |                   |
| <i>L. pilosa-8</i>      | 65.18        | 54.78        | 66.67        | conserved               | conserved          | conserved        | XXXXX        |                   |
| <i>L. pilosa-9</i>      | 64.78        | 54.78        | 66.67        | conserved               | conserved          | conserved        | XXXXX        |                   |
| <i>L. potaninii-3-1</i> | 63.71        | 54.78        | 67.61        | conserved               | conserved          | conserved        | XXXXX        |                   |
| <i>L. potaninii-3-2</i> | 63.31        | 54.14        | 67.61        | conserved               | conserved          | conserved        | XXXXX        |                   |
| <i>L. potaninii-3-3</i> | 63.71        | 54.78        | 67.61        | conserved               | conserved          | conserved        | XXXXX        |                   |
| <i>L. potaninii-3-4</i> | 62.90        | 54.78        | 67.14        | conserved               | conserved          | conserved        | XXXXX        |                   |
| <i>L. potaninii-3-5</i> | 63.05        | 54.78        | 67.61        | conserved               | conserved          | conserved        | XXXXX        |                   |
| <i>L. potaninii-3-6</i> | 63.71        | 54.78        | 67.61        | conserved               | conserved          | conserved        | XXXXX        |                   |
| <i>L. potaninii-3-7</i> | 63.31        | 54.78        | 67.14        | conserved               | conserved          | conserved        | XXXXX        |                   |
| <i>L. potaninii-3-8</i> | 63.31        | 54.78        | 67.14        | conserved               | conserved          | conserved        | XXXXX        |                   |
| <i>L. repens-1</i>      | 63.37        | 54.49        | 64.79        | conserved               | conserved          | conserved        | XXXXX        |                   |
| <i>L. repens-2</i>      | 62.96        | 54.78        | 64.32        | conserved               | conserved          | conserved        | XXXXX        |                   |
| <i>L. repens-3</i>      | 62.96        | 54.78        | 64.79        | conserved               | conserved          | conserved        | XXXXX        |                   |
| <i>L. repens-4</i>      | 62.96        | 54.78        | 64.79        | conserved               | conserved          | conserved        | XXXXX        |                   |
| <i>L. repens-5</i>      | 63.37        | 54.49        | 64.79        | conserved               | conserved          | conserved        | XXXXX        |                   |
| <i>L. repens-6</i>      | 62.96        | 54.78        | 64.32        | conserved               | conserved          | conserved        | XXXXX        |                   |
| <i>L. repens-7</i>      | 62.96        | 54.78        | 64.32        | conserved               | conserved          | conserved        | XXXXX        |                   |
| <i>L. repens-8</i>      | 62.96        | 54.78        | 64.32        | conserved               | conserved          | conserved        | XXXXX        |                   |
| <i>L. repens-9</i>      | 62.96        | 54.78        | 64.32        | conserved               | conserved          | conserved        | XXXXX        |                   |
| <i>L. stuevei-1</i>     | 62.96        | 54.78        | 63.38        | conserved               | conserved          | conserved        | XXXXX        |                   |
| <i>L. stuevei-2</i>     | 62.96        | 54.78        | 63.38        | conserved               | conserved          | conserved        | XXXXX        |                   |
| <i>L. stuevei-3</i>     | 62.20        | 54.78        | 63.38        | conserved               | conserved          | conserved        | XXXXX        |                   |
| <i>L. stuevei-4</i>     | 62.96        | 54.78        | 63.38        | conserved               | conserved          | conserved        | XXXXX        |                   |
| <i>L. stuevei-5</i>     | 62.96        | 54.78        | 63.38        | conserved               | conserved          | conserved        | XXXXX        |                   |
| <i>L. stuevei-6</i>     | 62.55        | 54.78        | 63.38        | conserved               | conserved          | conserved        | XXXXX        |                   |
| <i>L. stuevei-7</i>     | 62.96        | 54.78        | 63.38        | conserved               | conserved          | conserved        | XXXXX        |                   |
| <i>L. stuevei-8</i>     | 62.96        | 54.78        | 63.38        | conserved               | conserved          | conserved        | XXXXX        |                   |
| <i>L. stuevei-9</i>     | 62.55        | 54.78        | 63.38        | conserved               | conserved          | conserved        | XXXXX        |                   |
| <i>L. stuevei-10</i>    | 62.96        | 54.78        | 63.38        | conserved               | conserved          | conserved        | XXXXX        |                   |
| <i>L. tomentosa-1-1</i> | 62.03        | 55.41        | 63.30        | conserved               | conserved          | conserved        | XXXXX        |                   |
| <i>L. tomentosa-1-2</i> | 62.03        | 55.41        | 63.30        | conserved               | conserved          | conserved        | XXXXX        |                   |
| <i>L. tomentosa-1-3</i> | 62.45        | 55.41        | 63.30        | conserved               | conserved          | conserved        | XXXXX        |                   |
| <i>L. tomentosa-1-4</i> | 62.03        | 55.41        | 63.30        | conserved               | conserved          | conserved        | XXXXX        |                   |
| <i>L. tomentosa-1-5</i> | 62.03        | 55.41        | 63.30        | conserved               | conserved          | conserved        | XXXXX        |                   |

|                                |              |              |              |              |           |             |              |                   |
|--------------------------------|--------------|--------------|--------------|--------------|-----------|-------------|--------------|-------------------|
| <i>L. tomentosa</i> -1-6       | 62.03        | 55.41        | 63.30        | conserved    | conserved | conserved   | XXXXXX       |                   |
| <i>L. tomentosa</i> -1-7       | 61.60        | 55.41        | 63.30        | conserved    | conserved | conserved   | XXXXXX       |                   |
| <i>L. tomentosa</i> -1-8       | 62.03        | 55.41        | 63.30        | conserved    | conserved | conserved   | XXXXXX       |                   |
| <i>L. tomentosa</i> -1-9       | 62.03        | 55.41        | 63.30        | conserved    | conserved | conserved   | XXXXXX       |                   |
| <i>L. tomentosa</i> -1-10      | 62.03        | 55.41        | 63.30        | conserved    | conserved | conserved   | XXXXXX       |                   |
| <i>L. violacea</i> -1          | 62.96        | 54.78        | 64.32        | conserved    | conserved | conserved   | XXXXXX       |                   |
| <i>L. violacea</i> -2          | 62.96        | 54.78        | 64.32        | conserved    | conserved | conserved   | XXXXXX       |                   |
| <i>L. violacea</i> -3          | 62.96        | 54.78        | 64.32        | conserved    | conserved | conserved   | XXXXXX       |                   |
| <i>L. violacea</i> -4          | 62.96        | 54.78        | 64.32        | conserved    | conserved | conserved   | XXXXXX       |                   |
| <i>L. violacea</i> -5          | 62.96        | 54.14        | 64.32        | conserved    | conserved | conserved   | XXXXXX       |                   |
| <i>L. violacea</i> -6          | 62.96        | 54.78        | 64.32        | conserved    | conserved | conserved   | XXXXXX       |                   |
| <i>L. violacea</i> -7          | 62.96        | 54.78        | 64.32        | conserved    | conserved | conserved   | XXXXXX       |                   |
| <i>L. violacea</i> -8          | 62.96        | 54.78        | 64.32        | conserved    | conserved | conserved   | XXXXXX       |                   |
| <i>L. violacea</i> -9          | 62.96        | 54.78        | 64.32        | conserved    | conserved | conserved   | XXXXXX       |                   |
| <i>L. violacea</i> -10         | 62.96        | 54.78        | 64.32        | conserved    | conserved | conserved   | XXXXXX       |                   |
| <i>L. virgata</i> -2-1         | 60.34        | 54.78        | 62.91        | conserved    | conserved | conserved   | XXXXXX       |                   |
| <i>L. virgata</i> -2-2         | 60.76        | 54.78        | 62.91        | conserved    | conserved | conserved   | XXXXXX       |                   |
| <i>L. virgata</i> -2-3         | 60.76        | 54.78        | 62.91        | conserved    | conserved | conserved   | XXXXXX       |                   |
| <i>L. virgata</i> -2-4         | 60.76        | 54.78        | 62.91        | conserved    | conserved | conserved   | XXXXXX       |                   |
| <i>L. virgata</i> -2-5         | 60.76        | 54.78        | 62.91        | conserved    | conserved | conserved   | XXXXXX       |                   |
| <i>L. virgata</i> -2-6         | 60.76        | 54.78        | 62.91        | conserved    | conserved | conserved   | XXXXXX       |                   |
| <i>L. virgata</i> -2-7         | 60.76        | 54.78        | 62.91        | conserved    | conserved | conserved   | XXXXXX       |                   |
| <i>L. virgata</i> -2-8         | 60.76        | 54.78        | 62.91        | conserved    | conserved | conserved   | XXXXXX       |                   |
| <i>L. virgata</i> -2-9         | 61.18        | 54.78        | 63.38        | conserved    | conserved | conserved   | XXXXXX       |                   |
| <i>L. virgata</i> -2-10        | 60.76        | 54.78        | 62.91        | conserved    | conserved | conserved   | XXXXXX       |                   |
| <i>L. virginica</i> -1         | 62.96        | 54.78        | 63.85        | conserved    | conserved | conserved   | XXXXXX       |                   |
| <i>L. virginica</i> -2         | 62.96        | 54.78        | 63.85        | conserved    | conserved | conserved   | XXXXXX       |                   |
| <i>L. virginica</i> -3         | 62.96        | 54.78        | 63.85        | conserved    | conserved | conserved   | XXXXXX       |                   |
| <i>L. virginica</i> -4         | 62.96        | 54.78        | 63.85        | conserved    | conserved | conserved   | XXXXXX       |                   |
| <i>L. virginica</i> -5         | 62.96        | 54.78        | 63.85        | conserved    | conserved | conserved   | XXXXXX       |                   |
| <i>L. virginica</i> -6         | 62.96        | 54.78        | 63.85        | conserved    | conserved | conserved   | XXXXXX       |                   |
| <i>L. virginica</i> -7         | 62.96        | 54.78        | 63.85        | conserved    | conserved | conserved   | XXXXXX       |                   |
| <i>L. virginica</i> -8         | 62.96        | 54.78        | 63.85        | conserved    | conserved | conserved   | XXXXXX       |                   |
| <i>L. virginica</i> -9         | 62.96        | 54.78        | 63.85        | conserved    | conserved | conserved   | XXXXXX       |                   |
| <i>L. wilfordii</i> -1-1       | 65.32        | 54.78        | 68.54        | conserved    | conserved | conserved   | XXXXXX       |                   |
| <i>L. wilfordii</i> -1-2       | 65.32        | 54.78        | 68.54        | conserved    | conserved | conserved   | XXXXXX       |                   |
| <i>L. wilfordii</i> -1-3       | 64.92        | 54.78        | 68.54        | conserved    | conserved | conserved   | XXXXXX       |                   |
| <i>L. wilfordii</i> -1-4       | 65.32        | 55.41        | 68.08        | conserved    | conserved | conserved   | XXXXXX       |                   |
| <i>L. wilfordii</i> -1-5       | 65.73        | 54.78        | 68.08        | conserved    | conserved | conserved   | XXXXXX       |                   |
| <i>L. wilfordii</i> -1-6       | 65.73        | 55.41        | 67.61        | conserved    | conserved | conserved   | XXXXXX       |                   |
| <b><i>L. wilfordii</i>-1-7</b> | 65.73        | 53.50        | <b>60.56</b> | conserved    | conserved | conserved   | <b>XXXX-</b> | <b>pseudogene</b> |
| <i>L. wilfordii</i> -1-8       | 65.99        | 54.78        | 68.08        | conserved    | conserved | conserved   | XXXXXX       |                   |
| <i>L. wilfordii</i> -1-9       | 65.32        | 54.78        | 68.08        | conserved    | conserved | conserved   | XXXXXX       |                   |
| <i>L. wilfordii</i> -1-10      | 65.32        | 54.78        | 68.08        | conserved    | conserved | conserved   | XXXXXX       |                   |
| <b><i>L. wilfordii</i>-2-1</b> | <b>61.89</b> | <b>51.92</b> | <b>60.09</b> | <b>nt-14</b> | conserved | <b>nt-4</b> | <b>XXXX-</b> | <b>pseudogene</b> |
| <i>L. wilfordii</i> -2-2       | 65.99        | 54.78        | 68.54        | conserved    | conserved | conserved   | XXXXXX       |                   |
| <b><i>L. wilfordii</i>-2-3</b> | 63.93        | 54.78        | <b>62.91</b> | conserved    | conserved | conserved   | XXXXXX       | <b>pseudogene</b> |
| <i>L. wilfordii</i> -2-4       | 65.99        | 54.78        | 68.54        | conserved    | conserved | conserved   | XXXXXX       |                   |
| <i>L. wilfordii</i> -2-5       | 65.73        | 54.78        | 68.08        | conserved    | conserved | conserved   | XXXXXX       |                   |
| <i>L. wilfordii</i> -2-6       | 65.99        | 54.78        | 68.54        | conserved    | conserved | conserved   | XXXXXX       |                   |
| <b><i>L. wilfordii</i>-2-7</b> | <b>59.43</b> | <b>51.92</b> | <b>59.62</b> | <b>nt-14</b> | conserved | <b>nt-4</b> | <b>XXXX-</b> | <b>pseudogene</b> |

|                          |              |              |              |                     |                |                  |              |                   |
|--------------------------|--------------|--------------|--------------|---------------------|----------------|------------------|--------------|-------------------|
| <i>L. wilfordii</i> -2-8 | <b>46.98</b> | <b>42.31</b> | <b>47.62</b> | <b>nt-8,9,12,16</b> | <b>nt-6,14</b> | <b>nt-8,9,10</b> | -----        | <b>pseudogene</b> |
| <i>L. wilfordii</i> -2-9 | <b>59.84</b> | <b>51.92</b> | <b>60.09</b> | <b>nt-14</b>        | conserved      | <b>nt-4</b>      | <b>XXXX-</b> | <b>pseudogene</b> |
| <i>L. wilfordii</i> -3-1 | 66.27        | 54.78        | 68.08        | conserved           | conserved      | conserved        | XXXXXX       |                   |
| <i>L. wilfordii</i> -3-2 | 65.87        | 54.78        | 68.08        | conserved           | conserved      | conserved        | XXXXXX       |                   |
| <i>L. wilfordii</i> -3-3 | <b>54.51</b> | <b>51.59</b> | <b>59.62</b> | <b>nt-2,11</b>      | <b>nt-9</b>    | conserved        | <b>X-XXX</b> | <b>pseudogene</b> |
| <i>L. wilfordii</i> -3-4 | 65.87        | 54.78        | 68.08        | conserved           | conserved      | conserved        | XXXXXX       |                   |
| <i>L. wilfordii</i> -3-5 | 65.87        | 54.78        | 68.08        | conserved           | conserved      | conserved        | XXXXXX       |                   |
| <i>L. wilfordii</i> -3-6 | 65.87        | 54.78        | 68.08        | conserved           | conserved      | conserved        | XXXXXX       |                   |
| <i>L. wilfordii</i> -3-7 | 66.27        | 54.14        | 68.08        | conserved           | conserved      | conserved        | XXXXXX       |                   |

---
